# Supplementary material
Source: HighWire-hosted journal article supplement (https://www.rcpjournals.org/highwire/filestream/7179/field_highwire_adjunct_files/0/OTuathaigh_S1.pdf)
Supplement: OTuathaigh_S1.pdf [file OTuathaigh_S1.pdf]

## CPD - Consultant/NCHD Needs Analysis Questionnaire

Dear Colleagues,

We would really appreciate if you could take 10-15 minutes to complete this Questionnaire. This is a national survey looking at various aspects of CPD. Over 500 GPs have already completed the survey. All replies are confidential, anonymous, and for academic purposes.

CPD is a mandatory requirement for all doctors. Doctors have varying CPD interests and differ in how and when they want courses delivered. Universities need to understand the CPD needs of doctors so that they can better address these needs at Undergraduate and Post-Graduate level.

My sincere thanks for completing the survey.

Dr Bridget Maher

Senior Lecturer in Medical Education,

School of Medicine, UCC.

## CPD - Consultant/NCHD Needs Analysis Questionnaire

### Section 1: Your Details

These questions relate to demographic data such as age, gender, location, nationality and speciality.

1. Gender

2. Hospital Location

3. Employment

4. What is your age?

5. Where did you do your Post-Graduate Training?

6. Nationality

7. Speciality

**CPD - Consultant/NCHD Needs Analysis Questionnaire**

**Section 1: Training Needs Analysis**

**In order to perform your job effectively you need relevant skills. Rating A refers to how important you consider the activity to be for the successful performance of your job; Rating B relates to how well you think you currently perform that activity.**

1. Please rate each skill below on a scale of 1-7. Rating (A) refers to how important the activity is to the successful performance of your job; Rating (B) relates to how well you consider you currently perform this activity.

A. How important is this activity to the successful performance of your job?

B. How well do you currently perform this activity? 1= Poorly; 7 = Very Well

|                                                              | A. How important is this activity to the successful performance of your job? | B. How well do you currently perform this activity? 1= Poorly; 7 = Very Well |
|--------------------------------------------------------------|------------------------------------------------------------------------------|------------------------------------------------------------------------------|
| 1. Communicating well with patients                          | <input type="text"/>                                                         | <input type="text"/>                                                         |
| 2. Good record-keeping/data input/reports                    | <input type="text"/>                                                         | <input type="text"/>                                                         |
| 3. Safe and evidence-based prescribing                       | <input type="text"/>                                                         | <input type="text"/>                                                         |
| 4. Appraising performance/conducting audit                   | <input type="text"/>                                                         | <input type="text"/>                                                         |
| 5. Getting on with your colleagues/team                      | <input type="text"/>                                                         | <input type="text"/>                                                         |
| 6. Statistical analysis of your own research data            | <input type="text"/>                                                         | <input type="text"/>                                                         |
| 7. Practising Evidence-Based Medicine/Clinical Guidelines    | <input type="text"/>                                                         | <input type="text"/>                                                         |
| 8. Procedural skills                                         | <input type="text"/>                                                         | <input type="text"/>                                                         |
| 9. Recognizing and managing risk in clinical practice        | <input type="text"/>                                                         | <input type="text"/>                                                         |
| 10. Doing procedures/using new equipment/technology          | <input type="text"/>                                                         | <input type="text"/>                                                         |
| 11. Introducing new ideas/services/clinics                   | <input type="text"/>                                                         | <input type="text"/>                                                         |
| 12. Searching medical literature/online healthcare resources | <input type="text"/>                                                         | <input type="text"/>                                                         |
| 13. Giving feedback                                          | <input type="text"/>                                                         | <input type="text"/>                                                         |
| 14. Giving clear advice/information/instructions to patients | <input type="text"/>                                                         | <input type="text"/>                                                         |

A. How important is this activity to the successful performance of your job?

B. How well do you currently perform this activity? 1= Poorly; 7 = Very Well

|                                                                                |                      |                      |
|--------------------------------------------------------------------------------|----------------------|----------------------|
| 15. Negotiation and conflict resolution skills                                 | <input type="text"/> | <input type="text"/> |
| 16. Teaching/training colleagues, staff or students                            | <input type="text"/> | <input type="text"/> |
| 17. Planning and organising individual patient care                            | <input type="text"/> | <input type="text"/> |
| 18. Assessing patients' psychological and social needs                         | <input type="text"/> | <input type="text"/> |
| 19. Organizing and managing your time and workload                             | <input type="text"/> | <input type="text"/> |
| 20. Use of new media/digital technology                                        | <input type="text"/> | <input type="text"/> |
| 21. Writing Medico-Legal Reports/Legal Medicine/Medical Ethics                 | <input type="text"/> | <input type="text"/> |
| 22. Practicing Health Promotion and Preventative Medicine                      | <input type="text"/> | <input type="text"/> |
| 23. Resource management/ business skills/generating income/practice management | <input type="text"/> | <input type="text"/> |
| 24. Writing and publishing your research                                       | <input type="text"/> | <input type="text"/> |
| 25. Designing, supervising, managing research projects                         | <input type="text"/> | <input type="text"/> |
| 26. Accessing research resources e.g. time, money (funding), information       | <input type="text"/> | <input type="text"/> |
| 27. Working as a member of a team                                              | <input type="text"/> | <input type="text"/> |
| 28. Patient advocacy, social duty as a doctor                                  | <input type="text"/> | <input type="text"/> |
| 29. Communications with HSE/regulatory agencies/professional bodies            | <input type="text"/> | <input type="text"/> |
| 30. Coping with and managing change in the healthcare service                  | <input type="text"/> | <input type="text"/> |
| 31. Prescribing healthy lifestyle and weight management                        | <input type="text"/> | <input type="text"/> |
| 32. Stress Management (self)                                                   | <input type="text"/> | <input type="text"/> |
| 33. Leadership skills                                                          | <input type="text"/> | <input type="text"/> |

## Section 2: Courses and Training

This section asks you to rate (1-7, where 1= not important at all and 7= very important) how important you consider various topics to be and also to indicate (Yes/No) the topics where you have recently done courses or training/are doing courses or training.

1. Regarding the topics below, please answer the following questions:

I have recently done/am doing courses/training in the following: How important would you rate each topic (1= not at all important and 7= very important).

|                                                   |                      |                      |
|---------------------------------------------------|----------------------|----------------------|
| 1. CPR                                            | <input type="text"/> | <input type="text"/> |
| 2. Medical Education/Assessment                   | <input type="text"/> | <input type="text"/> |
| 3. Health and Safety in the Workplace             | <input type="text"/> | <input type="text"/> |
| 4. Nutrition                                      | <input type="text"/> | <input type="text"/> |
| 5. Quality Improvement                            | <input type="text"/> | <input type="text"/> |
| 6. Developing services and effecting change       | <input type="text"/> | <input type="text"/> |
| 7. Management skills                              | <input type="text"/> | <input type="text"/> |
| 8. Infection Control                              | <input type="text"/> | <input type="text"/> |
| 9. Coaching and Mentoring                         | <input type="text"/> | <input type="text"/> |
| 10. Patient Safety and Medical Error              | <input type="text"/> | <input type="text"/> |
| 11. Media training                                | <input type="text"/> | <input type="text"/> |
| 12. Presentation skills                           | <input type="text"/> | <input type="text"/> |
| 13. Interviewer skills                            | <input type="text"/> | <input type="text"/> |
| 14. Cognitive Behavior Therapy                    | <input type="text"/> | <input type="text"/> |
| 15. Behavior Change                               | <input type="text"/> | <input type="text"/> |
| 16. Healthcare Economics/Resource Management      | <input type="text"/> | <input type="text"/> |
| 17. Apps, technology and social media in Medicine | <input type="text"/> | <input type="text"/> |
| 18. Human Anatomy                                 | <input type="text"/> | <input type="text"/> |
| 19. Resilience Training                           | <input type="text"/> | <input type="text"/> |
| 20. Disaster/Refugee Medicine                     | <input type="text"/> | <input type="text"/> |





3. Reflection on CPD activities

1. Strongly Disagree      2.      3.      4.      5.      6.      7. Strongly Agree

I regularly reflect on my CPD/ e-portfolio

                                  

4. Medical Council's Domains of Good Professional Practice

1. Strongly Disagree      2.      3.      4.      5.      6.      7. Strongly Agree

My CPD reflects the Medical Council's Domains of Good Professional Practice

                                  

5. CPD Guidance/Oversight

1. Strongly Disagree      2.      3.      4.      5.      6.      7. Strongly Agree

I would welcome feedback on how my CPD has addressed my targets/needs

                                  

6. Informing my CPD Needs

1. Strongly Disagree      2.      3.      4.      5.      6.      7. Strongly Agree

360 degree performance evaluation (by team members, patients etc.) should inform my CPD

                                  

7. Are there any areas that you would like to see developed as CPD?

8. Have you any other comments or opinions on CPD in general?
